# Supplementary material
Source: MDPI journal article supplement (https://www.mdpi.com/2673-6284/11/3/34)
Supplement: s1 [file s1]

# Development of SSR markers linked to stress responsive genes along tomato chromosome 3 (*Solanum lycopersicum* L.)

Mohammad Brake, Lana Al-Qadumii, Hassan Hamasha, Hussein Migdadi, Abi Awad, Nizar Haddad and Monther T. Sadder

**Supplementary Table S1.** Nearby genes for developed 20 SSR markers along with their description.

| SSR locus | Gene locus     | Chromosome coordinates          | Description                                                                                                                                                                                                      |
|-----------|----------------|---------------------------------|------------------------------------------------------------------------------------------------------------------------------------------------------------------------------------------------------------------|
| ju003     |                | SL2.50ch03: 67710651.. 67710885 |                                                                                                                                                                                                                  |
|           | Solyc03g118960 | SL2.50ch03:67708555..67710621   | Multidrug and toxin extrusion protein 1 (AHRD V1 *--- S47A1_XENTR); contains Interpro domain(s) IPR015521 MATE family transporter related protein                                                                |
|           | Solyc03g118970 | SL2.50ch03:67712885..67715799   | Multidrug resistance protein mdtK (AHRD V1 ***- MDTK_CITK8); contains Interpro domain(s) IPR015521 MATE family transporter related protein                                                                       |
|           | Solyc03g118950 | SL2.50ch03:67706003..67707289   | DsRNA-binding protein 3 (AHRD V1 ***- D7LRB5_ARALY); contains Interpro domain(s) IPR001159 Double-stranded RNA binding                                                                                           |
| ju004     |                | SL2.50ch03: 64521427..64521653  |                                                                                                                                                                                                                  |
|           | Solyc03g114580 | SL2.50ch03:64520115..64530361   | Uridine kinase (AHRD V1 *- *- C3SA58_BRADI); contains Interpro domain(s) IPR000764 Uridine kinase                                                                                                                |
|           | Solyc03g114560 | SL2.50ch03:64512634..64513982   | Strictosidine synthase family protein (AHRD V1 ***- D7LVM7_ARALY); contains Interpro domain(s) IPR004141 Strictosidine synthase                                                                                  |
|           | Solyc03g114550 | SL2.50ch03:64510484..64511709   | Strictosidine synthase family protein (AHRD V1 ***- D7LVM7_ARALY); contains Interpro domain(s) IPR004141 Strictosidine synthase                                                                                  |
| ju006     |                | SL2.50ch10: 42685545.. 42685785 |                                                                                                                                                                                                                  |
|           | Solyc10g047820 | SL2.50ch10:42763906..42766189   | Transporter CorA family (AHRD V1 *- *- Q62C47_BURMA)                                                                                                                                                             |
|           | Solyc10g047810 | SL2.50ch10:42751106..42753214   | Receptor protein kinase-like protein (AHRD V1 ***- Q9LSL5_ARATH); contains Interpro domain(s) IPR002290 Serine/threonine protein kinase                                                                          |
|           | Solyc10g047780 | SL2.50ch10:42473191..42474359   | Seed lectin (AHRD V1 *- *- LECS_VATMA); contains Interpro domain(s) IPR001220 Legume lectin, beta chain                                                                                                          |
|           | Solyc10g047770 | SL2.50ch10:42457293..42457550   | Receptor protein kinase-like protein (AHRD V1 ***- Q9LSL5_ARATH); contains Interpro domain(s) IPR017442 Serine/threonine protein kinase-related                                                                  |
| ju007     |                | SL2.50ch03: 66570341.. 66570470 |                                                                                                                                                                                                                  |
|           | Solyc03g117370 | SL2.50ch03:66533935..66538545   | WD-40 repeat protein (AHRD V1 *--- B2J4D1_NOSP7); contains Interpro domain(s) IPR017986 WD40 repeat, region                                                                                                      |
|           | Solyc03g117420 | SL2.50ch03:66554722..66569270   | Leucine-rich repeat family protein (AHRD V1 ***- D7KDI8_ARALY); contains Interpro domain(s) IPR006553 Leucine-rich repeat, cysteine-containing subtype                                                           |
|           | Solyc03g117380 | SL2.50ch03:66539750..66540396   | Topless-related protein 1 (AHRD V1 *- *- TPR1_ARATH)                                                                                                                                                             |
|           | Solyc03g117470 | SL2.50ch03:66615377..66620417   | Calcineurin subunit B (AHRD V1 *- *- B6U4N5_MAIZE); contains Interpro domain(s) IPR011992 EF-Hand type                                                                                                           |
|           | Solyc03g117480 | SL2.50ch03:66624199..66629058   | Pyrophosphate-energized proton pump (Pyrophosphate-energized inorganic pyrophosphatase) (H(+)-PPase) (AHRD V1 **** C7HW54_9FIRM); contains Interpro domain(s) IPR004131 Inorganic H <sup>+</sup> pyrophosphatase |

|       |                |                               |                                                                                                                                                              |
|-------|----------------|-------------------------------|--------------------------------------------------------------------------------------------------------------------------------------------------------------|
|       | Solyc03g117450 | SL2.50ch03:66611609..66612183 | Major allergen Mal d 1 (AHRD V1 ***- Q43550_MALDO); contains Interpro domain(s) IPR000916 Bet v I allergen                                                   |
|       | Solyc03g117430 | SL2.50ch03:66599928..66607724 | Cobalamin synthesis protein P (AHRD V1 ***- D3M8Z8_9ACTO); contains Interpro domain(s) IPR003495 Cobalamin (vitamin B12) biosynthesis CobW-like              |
| ju008 |                | SL2.50ch03:53049368..53049607 |                                                                                                                                                              |
|       | Solyc03g083200 | SL2.50ch03:53043734..53044215 | structural maintenance of chromosomes flexible hinge domain-containing protein GMI1 isoform X11 [                                                            |
|       | Solyc03g083190 | SL2.50ch03:53030731..53037929 | structural maintenance of chromosomes flexible hinge domain-containing protein GMI1 isoform X3                                                               |
|       | Solyc03g083210 | SL2.50ch03:53049663..53064618 | At5g24280 (Fragment) (AHRD V1 *- *- Q3YIX0_ARATH)                                                                                                            |
|       | Solyc03g083220 | SL2.50ch03:53071328..53072381 | Helicase-like protein (AHRD V1 *- *- Q69V29_ORYSJ); contains Interpro domain(s) IPR010285 Protein of unknown function DUF889, eukaryote                      |
| ju010 |                | SL2.50ch03: 3324789.. 3324994 |                                                                                                                                                              |
|       | Solyc03g026010 | SL2.50ch03:3420662..3422038   | Transmembrane protein 161B (AHRD V1 *- *- T161B_MOUSE)                                                                                                       |
|       | Solyc03g025970 | SL2.50ch03:3394813..3400693   | Methyl binding domain protein (AHRD V1 *- *- B9I4C0_POPTR); contains Interpro domain(s) IPR001739 Methyl-CpG DNA binding                                     |
|       | Solyc03g025980 | SL2.50ch03:3402975..3407759   | Peptidyl-prolyl cis-trans isomerase (Fragment) (AHRD V1 ***- A9Y0F6_9MYRT); contains Interpro domain(s) IPR007062 Protein phosphatase inhibitor 2 (IPP-2)    |
|       | Solyc03g025950 | SL2.50ch03:3384122..3387029   | Membrane-associated progesterone receptor component 1 (AHRD V1 ***- C0NU44_AJECG); contains Interpro domain(s) IPR001199 Cytochrome b5                       |
|       | Solyc03g025920 | SL2.50ch03:3334446..3335904   | F-box family protein (AHRD V1 ***- D7LS19_ARALY); contains Interpro domain(s) IPR001810 Cyclin-like F-box                                                    |
|       | Solyc03g025870 | SL2.50ch03:3256762..3259518   | MYB transcription factor (AHRD V1 *- *- Q9LTJ5_ARATH); contains Interpro domain(s) IPR015495 Myb transcription factor                                        |
|       | Solyc03g025840 | SL2.50ch03:3238954..3241512   | Cytochrome b561 (AHRD V1 ***- Q3LGX5_CITLA); contains Interpro domain(s) IPR004877 Cytochrome b561, eukaryote                                                |
| ju011 |                | SL2.50ch03:70061829..70062070 |                                                                                                                                                              |
|       | Solyc03g122100 | SL2.50ch03:70060756..70065647 | 3-oxoacyl-synthase I (AHRD V1 *- *- B6SJZ0_MAIZE); contains Interpro domain(s) IPR016038 Thiolase-like, subgroup                                             |
|       | Solyc03g122080 | SL2.50ch03:70050315..70052922 | Legume lectin beta domain (AHRD V1 *- *- A2Q3C0_MEDTR); contains Interpro domain(s) IPR010341 Protein of unknown function DUF936, plant                      |
|       | Solyc03g122040 | SL2.50ch03:70031953..70041568 | COP1-Interacting Protein1 7 (CIP7) (Fragment) (AHRD V1 *- *- Q7GDB1_ARATH)                                                                                   |
|       | Solyc03g122090 | SL2.50ch03:70055292..70058642 | Protein transport protein Sec22 (AHRD V1 *- *- B0CRV5_LACBS); contains Interpro domain(s) IPR001388 Synaptobrevin IPR010908 Longin                           |
|       | Solyc03g122070 | SL2.50ch03:70047510..70049605 | Uncharacterized ABC transporter ATP-binding protein/permease C9B6.09c (AHRD V1 *- *- YNT9_SCHPO); contains Interpro domain(s) IPR003439 ABC transporter-like |
|       | Solyc03g122130 | SL2.50ch03:70079537..70082001 | L-lactate dehydrogenase (AHRD V1 ***- C0S8Q7_PARBP); contains Interpro domain(s) IPR012133 Alpha-hydroxy acid dehydrogenase, FMN-dependent                   |
| ju014 |                | SL2.50ch03:66799080..66799311 |                                                                                                                                                              |

|       |                |                               |                                                                                                                                                                                                   |
|-------|----------------|-------------------------------|---------------------------------------------------------------------------------------------------------------------------------------------------------------------------------------------------|
|       | Solyc03g117750 | SL2.50ch03:66789853..66794315 | Polygalacturonase (AHRD V1 ***- B6SZN5_MAIZE); contains Interpro domain(s) IPR012334 P                                                                                                            |
|       | Solyc03g117730 | SL2.50ch03:66779750..66783039 | Tubby-like protein 13 (AHRD V1 ***- D2CMM7_ORYSJ); contains Interpro domain(s) IPR000007 Tubby, C-terminal                                                                                        |
|       | Solyc03g117720 | SL2.50ch03:66775127..66779386 | AP2-like ethylene-responsive transcription factor At1g16060 (AHRD V1 ***- AP2L1_ARATH); contains Interpro domain(s) IPR001471 Pathogenesis-related transcriptional factor and ERF, DNA-binding    |
|       | Solyc03g117770 | SL2.50ch03:66801297..66806435 | Serine incorporator 1 (AHRD V1 ***- B5X3W1_SALSA); contains Interpro domain(s) IPR005016 TMS membrane protein/tumour differentially expressed protein                                             |
|       | Solyc03g117740 | SL2.50ch03:66786743..66789552 | Chloroplast At1g16080 protein (Fragment) (AHRD V1 *- Q1HRY1_SOLLC)                                                                                                                                |
|       | Solyc03g117790 | SL2.50ch03:66813605..66820539 | Serine/threonine protein kinase (AHRD V1 *- Q16PN5_AEDAE); contains Interpro domain(s) IPR002290 Serine/threonine protein kinase                                                                  |
|       | Solyc03g117780 | SL2.50ch03:66806776..66811545 | UV excision repair protein RAD23 (AHRD V1 ***- B6JX15_SCHJY); contains Interpro domain(s) IPR004806 UV excision repair protein Rad23                                                              |
| ju015 |                | SL2.50ch03: 4614781..4615028  |                                                                                                                                                                                                   |
|       | Solyc03g032020 | SL2.50ch03:4516620..4519322   | Hydroxy-methylglutaryl-coenzyme A reductase (AHRD V1 **** O48624_TOBAC); contains Interpro domain(s) IPR002202 Hydroxymethylglutaryl-CoA reductase, class I/II, catalytic                         |
|       | Solyc03g032070 | SL2.50ch03:4583223..4586185   | Holliday junction ATP-dependent DNA helicase ruvB (AHRD V1 **** D0N0A1_PHYIN); contains Interpro domain(s) IPR010339 TIP49, C-terminal                                                            |
|       | Solyc03g032060 | SL2.50ch03:4571144..4571680   | Ring finger protein (AHRD V1 *- O49869_HORVU); contains Interpro domain(s) IPR018957 Zinc finger, C3HC4 RING-type                                                                                 |
|       | Solyc03g032040 | SL2.50ch03:4555538..4559925   | MFS family major facilitator transporter D-xylose cation symporter (AHRD V1 *** D4E1S5_SEROD); contains Interpro domain(s) IPR016196 Major facilitator superfamily, general substrate transporter |
|       | Solyc03g032090 | SL2.50ch03:4609738..4611021   | Amino acid transporter family protein (AHRD V1 **** D7LI10_ARALY); contains Interpro domain(s) IPR013057 Amino acid transporter, transmembrane                                                    |
|       | Solyc03g032150 | SL2.50ch03:4653491..4658660   | Serine/threonine kinase-like protein ABC1063 (AHRD V1 **** Q1KMP8_HORVD); contains Interpro domain(s) IPR002290 Serine/threonine protein kinase                                                   |
| ju017 |                | SL2.50ch03:67271681..67271951 |                                                                                                                                                                                                   |
|       | Solyc03g118380 | SL2.50ch03:67272508..67272981 | DNA-directed RNA polymerase II subunit (AHRD V1 **** A8N5F1_COPC7); contains Interpro domain(s) IPR012340 Nucleic acid-binding, OB-fold                                                           |
|       | Solyc03g118370 | SL2.50ch03:67265834..67269224 | Serine carboxypeptidase K10B2.2 (AHRD V1 **** B6TKD2_MAIZE); contains Interpro domain(s) IPR001563 Peptidase S10, serine carboxypeptidase                                                         |
|       | Solyc03g118390 | SL2.50ch03:67278298..67287556 | Coiled-coil domain-containing protein SCD2                                                                                                                                                        |
| ju022 |                | SL2.50ch12:5685216.. 5685492  |                                                                                                                                                                                                   |
|       | Solyc12g014630 | SL2.50ch12:5630952..5631575   | Cortical cell-delineating protein (AHRD V1 *--- B6U436_MAIZE); contains Interpro domain(s) IPR013770 Plant lipid transfer protein and hydrophobic protein, helical                                |
|       | Solyc12g015640 | SL2.50ch12:5642779..5645448   | Mitochondrial transcription termination factor (Fragment) (AHRD V1 *--- C6FB12_PSEMZ); contains Interpro domain(s) IPR003690 Mitochondrial tran-                                                  |

|                |                              |                                                                                                                                                                                        |
|----------------|------------------------------|----------------------------------------------------------------------------------------------------------------------------------------------------------------------------------------|
|                |                              | scription termination factor-related                                                                                                                                                   |
| Solyc12g015650 | SL2.50ch12:5649944..5651353  | Armadillo repeat containing 4 (AHRD V1 ***- A8K906_HUMAN); contains Interpro domain(s) IPR011989 Armadillo-like helical                                                                |
| Solyc12g015660 | SL2.50ch12:5655855..5659081  | Zinc ion binding protein (AHRD V1 ***- D7KN38_ARALY); contains Interpro domain(s) IPR013536 WLM                                                                                        |
| Solyc12g015680 | SL2.50ch12:5664926..5665519  | Ycf60 protein (AHRD V1 ***- Q8DJZ7_THEEB)                                                                                                                                              |
| Solyc12g015690 | SL2.50ch12:5671093..5671896  | Fasciclin-like arabinogalactan protein 10 (AHRD V1 ***- A9XTL5_GOSHI); contains Interpro domain(s) IPR000782 FAS1 domain                                                               |
| <hr/>          |                              |                                                                                                                                                                                        |
| ju023          | SL2.50ch12:5579349.. 5579659 |                                                                                                                                                                                        |
| Solyc12g014590 | SL2.50ch12:5578789..5581766  | Pirin (AHRD V1 ***- D7RJ70_CARPA); contains Interpro domain(s) IPR012093 Pirin                                                                                                         |
| Solyc12g014580 | SL2.50ch12:5577417..5577847  | Pollen allergen Ole e 6 (AHRD V1 *- *- ALL6_OLEEU); contains Interpro domain(s) IPR015333 Pollen allergen ole e 6                                                                      |
| Solyc12g014570 | SL2.50ch12:5569788..5576277  | Glycerophosphoryl diester phosphodiesterase family protein (AHRD V1 ***- D7MKI0_ARALY); contains Interpro domain(s) IPR017946 PLC-like phosphodiesterase, TIM beta/alpha-barrel domain |
| Solyc12g014600 | SL2.50ch12:5600467..5603988  | Heterogeneous nuclear ribonucleoprotein A3 (AHRD V1 *--- B6TGB9_MAIZE); contains Interpro domain(s) IPR000504 RNA recognition motif, RNP-1                                             |
| Solyc12g014660 | SL2.50ch12:5655855..5659081  | Zinc ion binding protein (AHRD V1 ***- D7KN38_ARALY); contains Interpro domain(s) IPR013536 WLM                                                                                        |
| Solyc12g014610 | SL2.50ch12:5610112..5616122  | WRKY transcription factor 78 (AHRD V1 ***- Q5HZ67_ORYSA); contains Interpro domain(s) IPR003657 DNA-binding WRKY                                                                       |
| <hr/>          |                              |                                                                                                                                                                                        |
| ju026          | SL2.50ch03:2747742.. 2747972 |                                                                                                                                                                                        |
| Solyc03g025310 | SL2.50ch03:2751529..2759474  | Sec-independent protein translocase protein tatA/E homolog (AHRD V1 *- *- D4TUR0_9NOST); contains Interpro domain(s) IPR006312 Twin-arginine translocation protein TatA/E              |
| Solyc03g025300 | SL2.50ch03:2743304..2743489  | protein FAR1-RELATED SEQUENCE 6-like                                                                                                                                                   |
| Solyc03g025290 | SL2.50ch03:2734190..2738566  | Hydroxyproline-rich glycoprotein family protein                                                                                                                                        |
| Solyc03g025320 | SL2.50ch03:2760932..2764000  | Hydroxycinnamoyl transferase (AHRD V1 ***- D2XJ64_9MAGN); contains Interpro domain(s) IPR003480 Transferase                                                                            |
| <hr/>          |                              |                                                                                                                                                                                        |
| ju027          | SL2.50ch03:2948914..2949151  |                                                                                                                                                                                        |
| Solyc03g025530 | SL2.50ch03:2911517..2919038  | S-layer domain protein (AHRD V1 *- *- B2J947_NOSP7); contains Interpro domain(s) IPR001119 S-layer homology region                                                                     |
| Solyc03g025510 | SL2.50ch03:2898281..2903218  | Calmodulin-binding heat shock protein (AHRD V1 ***- Q1RN86_GOSHI); contains Interpro domain(s) IPR002921 Lipase, class 3                                                               |
| Solyc03g025500 | SL2.50ch03:2893357..2896872  | Prolyl 4-hydroxylase alpha subunit-like protein (AHRD V1 ***- Q9LSI6_ARATH); contains Interpro domain(s) IPR006620 Prolyl 4-hydroxylase, alpha subunit                                 |
| Solyc03g025550 | SL2.50ch03:2943318..2949033  | Signal peptide peptidase family protein (AHRD V1 ***- D7M8R6_ARALY); contains Interpro domain(s) IPR007369 Peptidase A22B, signal peptide peptidase                                    |
| Solyc03g025560 | SL2.50ch03:2960198..2962401  | Undecaprenyl pyrophosphate synthase (AHRD V1 ****- UPPS_PYRFU); contains                                                                                                               |

|       |                |                                |                                                                                                                                                                                                                         |
|-------|----------------|--------------------------------|-------------------------------------------------------------------------------------------------------------------------------------------------------------------------------------------------------------------------|
|       | Solyc03g025600 | SL2.50ch03:2995919..3004569    | Interpro domain(s) IPR001441 Di-trans-poly-cis-decaprenylcistransferase-like Pectinacetyltransferase like protein (Fragment) (AHRD V1 *--- Q56WP8_ARATH); contains Interpro domain(s) IPR004963 Pectinacetyltransferase |
| ju029 |                | SL2.50ch03:69455523..69455806  |                                                                                                                                                                                                                         |
|       | Solyc03g121270 | SL2.50ch03:69429833..69434237  | IAA-amino acid hydrolase (AHRD V1 **** D5FTH2_POPTO); contains Interpro domain(s) IPR017439 Peptidase M20D, mername-AA028/carboxypeptidase Ss1                                                                          |
|       | Solyc03g121290 | SL2.50ch03:69441939..69444677  | F-box family protein (AHRD V1 ***- B9I3S8_POPTR); contains Interpro domain(s) IPR001810 Cyclin-like F-box                                                                                                               |
|       | Solyc03g121310 | SL2.50ch03:69446948..69451780  | RWD domain-containing protein (AHRD V1 ***- Q38HU0_SOLTU); contains Interpro domain(s) IPR006575 RWD                                                                                                                    |
|       | Solyc03g121350 | SL2.50ch03:69465476..69471549  | Anoctamin-like protein (AHRD V1 ***- D0MXY8_PHYIN); contains Interpro domain(s) IPR007632 Protein of unknown function DUF590                                                                                            |
|       | Solyc03g121360 | SL2.50ch03:69474092..69474703  | Charged multivesicular body protein 1b (AHRD V1 ***- B6T9W6_MAIZE); contains Interpro domain(s) IPR005024 Snf7                                                                                                          |
| ju035 |                | SL2.50ch03:63216535..63216811  |                                                                                                                                                                                                                         |
|       | Solyc03g112890 | SL2.50ch03:63173294..63175404  | Myb family transcription factor (AHRD V1 *-*- D7M9F3_ARALY); contains Interpro domain(s) IPR015495 Myb transcription factor                                                                                             |
|       | Solyc03g112910 | SL2.50ch03:63189344..63204073  | Pantothenate kinase (AHRD V1 *-** C1FDA4_9CHLO); contains Interpro domain(s) IPR015844 Pantothenate kinase, acetyl-CoA regulated, two-domain type                                                                       |
|       | Solyc03g112900 | SL2.50ch03:63185027..63188415  | Iron-sulfur cluster assembly scaffold protein IscU (AHRD V1 **** D0I7Q6_VIBHO); contains Interpro domain(s) IPR002871 NIF system FeS cluster assembly, NifU, N-terminal                                                 |
|       | Solyc03g112920 | SL2.50ch03:63207372..63207902  | C2H2L domain class transcription factor (AHRD V1 ***- D9ZIU3_MALDO)                                                                                                                                                     |
|       | Solyc03g112930 | SL2.50ch03:63221882..63223966  | Dof zinc finger protein-like (AHRD V1 ***- Q0WPR9_ARATH); contains Interpro domain(s) IPR003851 Zinc finger, Dof-type                                                                                                   |
|       | Solyc03g112950 | SL2.50ch03:63256327..63287724  | Serine/threonine-protein kinase (AHRD V1 ***- D2V0W7_NAEGR); contains Interpro domain(s) IPR015519 Ataxia-Telangiectasia Mutated                                                                                        |
| ju037 |                | SL2.50ch03:64862699..64862925  |                                                                                                                                                                                                                         |
|       | Solyc03g114980 | SL2.50ch03:64837867..64839736  | Unknown Protein (AHRD V1)                                                                                                                                                                                               |
|       | Solyc03g115000 | SL2.50ch03:64852540..64857706  | Belongs to the 26 member TON1 Recruiting Motif family. Interacts with OFPs through the M8 motif.                                                                                                                        |
|       | Solyc03g115010 | SL2.50ch03:64866814..64867839  | Transcription factor CYCLOIDEA (Fragment) (AHRD V1 *-*- CYCLD_ANTML); contains Interpro domain(s) IPR005333 Transcription factor, TCP                                                                                   |
|       | Solyc03g115030 | SL2.50ch03:64880092..64882233  | Mitochondrial import receptor subunit TOM5 homolog (AHRD V1 ***- TOM5_ARATH)                                                                                                                                            |
|       | Solyc03g115040 | SL2.50ch03:64882651..64884482  | Xylanase inhibitor (Fragment) (AHRD V1 ***- Q53IQ4_WHEAT); contains Interpro domain(s) IPR001461 Peptidase A1                                                                                                           |
| ju039 |                | SL2.50ch04: 25472989..25473278 |                                                                                                                                                                                                                         |
|       | Solyc04g025160 | SL2.50ch04:25432546..25438502  | Arsenite ATPase transporter (Eurofung) (AHRD V1 **** C8VJ74_EMENI); contains Interpro domain(s) IPR003348 ATPase, anion-transporting                                                                                    |
|       | Solyc04g025120 | SL2.50ch04:25460162..25460317  | Arsenite translocating ATPase-like protein (Fragment) (AHRD V1 ***-                                                                                                                                                     |

| A8JGB0_CHLRE) |                |                               |                                                                                                                                                                           |
|---------------|----------------|-------------------------------|---------------------------------------------------------------------------------------------------------------------------------------------------------------------------|
| ju040         |                | SL2.50ch03:65907225..65907561 |                                                                                                                                                                           |
|               | Solyc03g116500 | SL2.50ch03:65900461..65904769 | polygalacturonase (XOPG1)                                                                                                                                                 |
|               | Solyc03g116530 | SL2.50ch03:65913029..65914334 | Glyoxalase/bleomycin resistance protein/dioxygenase (AHRD V1 ***-Q2HVV5_MEDTR); contains Interpro domain(s) IPR004360 Glyoxalase/bleomycin resistance protein/dioxygenase |
| ju041         |                | SL2.50ch03:18327688..18328001 |                                                                                                                                                                           |
|               | Solyc03g071690 | SL2.50ch03:18328472..18330381 | Non-symbiotic hemoglobin 2 (AHRD V1 ***- D7L8Z8_ARALY); contains Interpro domain(s) IPR001032 Leghaemoglobin                                                              |
|               | Solyc03g071680 | SL2.50ch03:18320038..18322555 | golgin subfamily A member 6-like protein 22 isoform X1                                                                                                                    |
|               | Solyc03g071670 | SL2.50ch03:18316096..18318175 | Protein binding protein (AHRD V1 ***- D7LXJ1_ARALY)                                                                                                                       |
|               | Solyc03g071660 | SL2.50ch03:18305959..18306838 | WD40 repeat domain-containing protein (AHRD V1 ***- D2V3E5_NAEGR)                                                                                                         |
